# Supplementary material for: Non-Invasive Myocardial Work in Patients with Severe Aortic Stenosis
Source: MDPI journal article supplement (doi:10.3390/jcm11030747), 2022-01-29

## Supplementary Material

Supplementary Table S1. Echocardiographic data

|                           | Pre-TAVI     | Post-TAVI    | P value |
|---------------------------|--------------|--------------|---------|
| Systolic BP (mmHg)        | 135.4 ± 20.9 | 124.5 ± 14.5 | 0.002   |
| Diasolic BP (mmHg)        | 74.7 ± 10.1  | 66.6 ± 8.7   | <0.001  |
| TAPSE (mm)                | 21.5 ± 3.1   | 23.7 ± 4     | 0.064   |
| PASP (mmHg)               | 41.6 ± 10.9  | 39.7 ± 10    | 0.292   |
| LAVi (ml/m <sup>3</sup> ) | 43.8 ± 8.4   | 44.1 ± 8.8   | 0.341   |
| E/e'                      | 13.2 ± 3     | 12.7 ± 2.1   | 0.334   |
| LVEDD (mm)                | 50.6 ± 7.1   | 48.4 ± 6     | 0.869   |
| IVSd (mm)                 | 14.1 ± 3     | 13.9 ± 3.1   | 0.217   |
| LVEF (%)                  | 52.8 ± 9.3   | 52.1 ± 9.3   | 0.063   |
| GLS (%)                   | -16.8 ± 5    | -18.8 ± 4    | 0.060   |
| AV mean gradient (mmHg)   | 46.7 ± 15.8  | 10.5 ± 5.9   | <0.001  |

BP, Blood Pressure; TAPSE, Tricuspid Annular Plane Excursion; PASP, Pulmonary Artery Systolic Pressure; LAVi, Left Atrial Volume index; LVEDD, Left Ventricular End-Diastolic Diameter; IVSd, Interventricular Septal Diameter diastolic; LVEF, Left Ventricular Ejection Fraction; GLS, Global Longitudinal Strain; AV, Aortic Valve.

### Legend to Supplementary Figures

**Supplementary Figure S1 (SF1).** Bland-Altman plot showing good correspondence between estimated and invasively measured left ventricular (LV) pressure. SD=standard deviation.

**Supplementary Figure S2 (SF2).** Comparison of mean baseline LV Ejection Fraction (upper panel) and Global Longitudinal Strain (lower panel) between men and women.

**Supplementary Figure S3 (SF3).** Comparison of mean baseline LV Ejection Fraction (upper panel) and Global Longitudinal Strain (lower panel) between patients with normal high gradient severe aortic stenosis (HG) and low flow/low gradient severe aortic stenosis (LF-LG).

Supplementary Figure S1 (SF1).

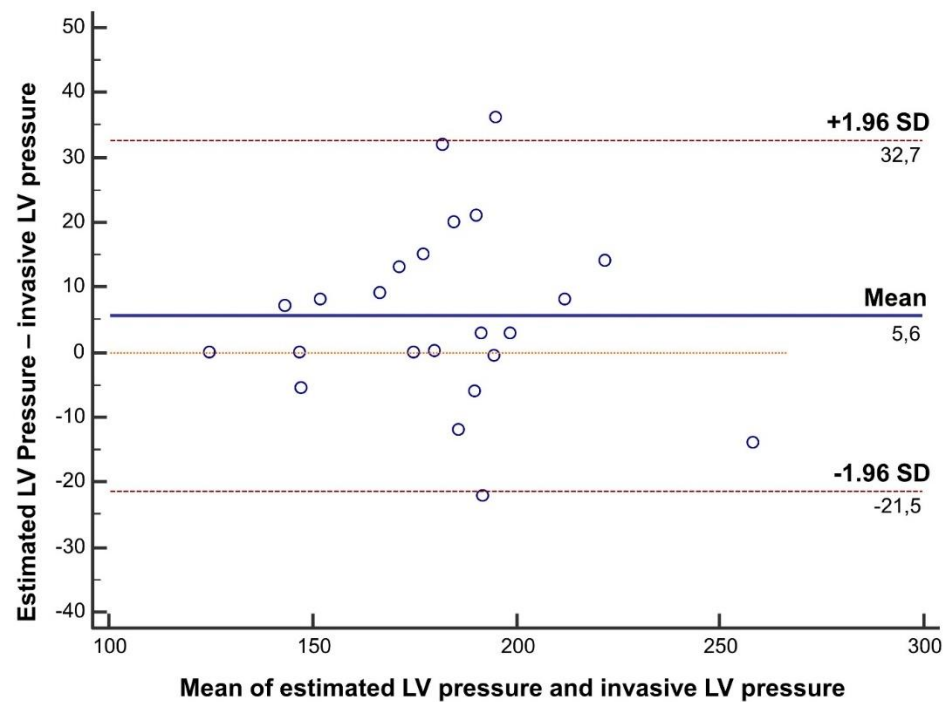

Supplementary Figure S2 (SF2).

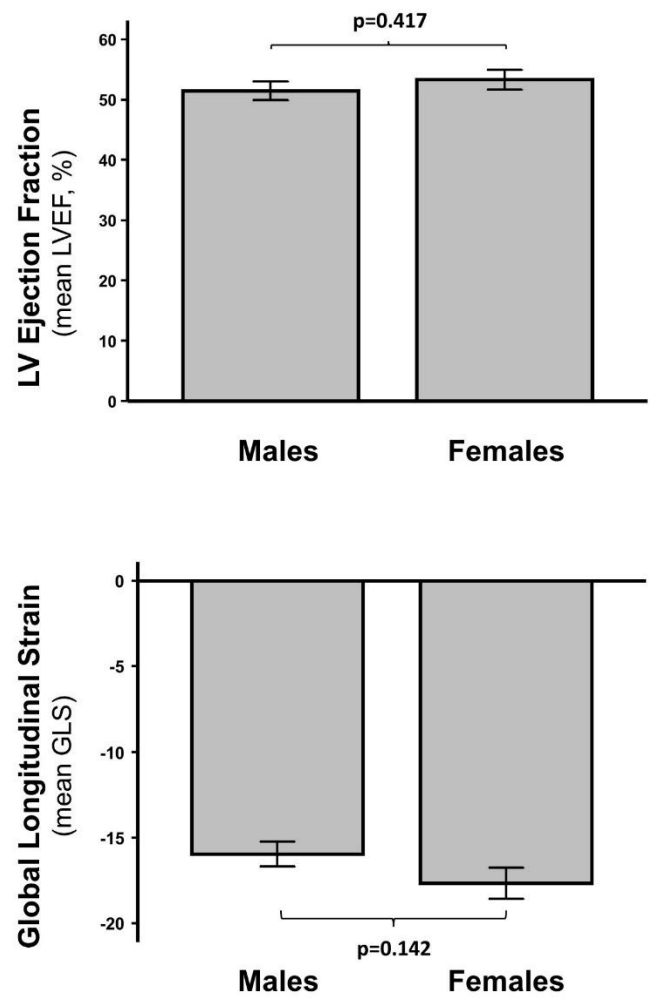

Supplementary Figure S3 (SF3).

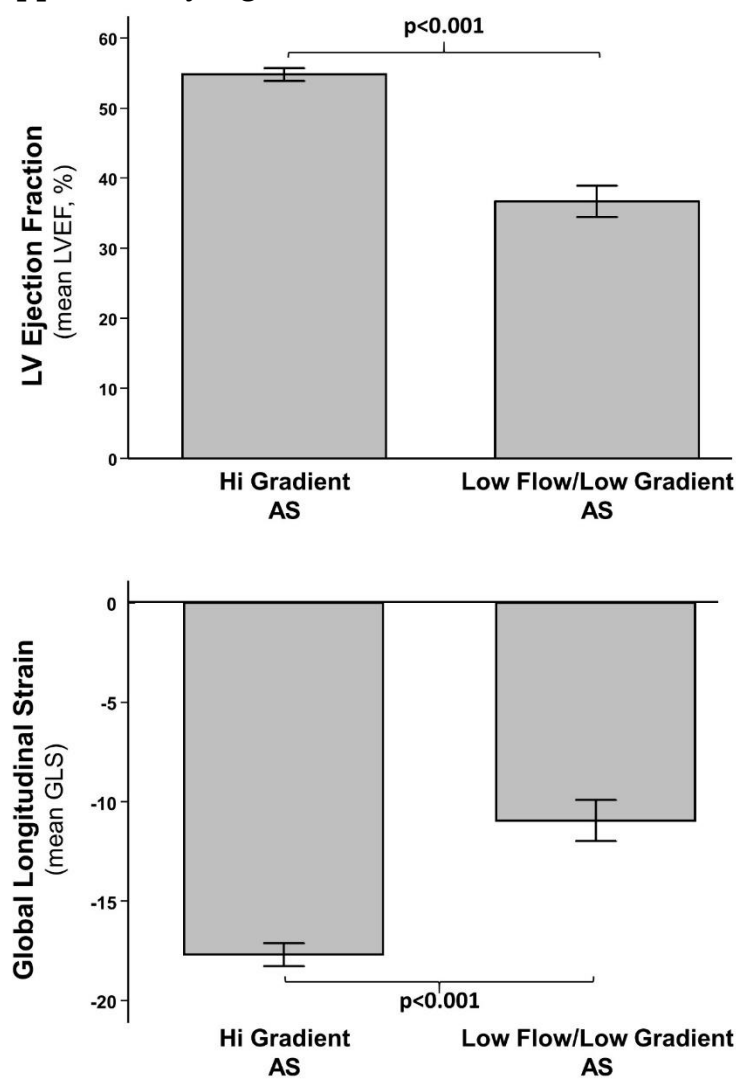

Supplement: s1 [file s1]
